# Supplementary material
Source: PubMed Central journal article supplement (PMC8557572)
Supplement: 12889_2021_11953_MOESM1_ESM.pdf [file 12889_2021_11953_MOESM1_ESM.pdf]

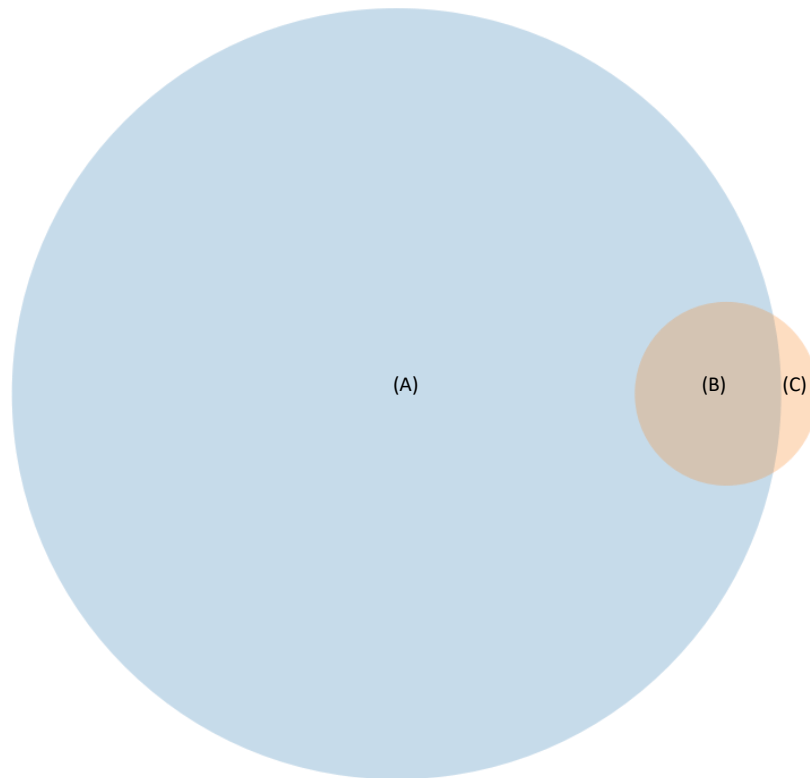

Comparison of food outlets registered with Just Eat and Deliveroo in one region in England (April 2020).

(A) = Food outlets registered to accept orders through Just Eat. N = **1673**

(B) = Food outlets registered to accept orders through Deliveroo. N = **334**

(C) = Food outlets exclusively registered to accept orders through Deliveroo. N = **91**
